# Supplementary material for: Extracellular Vesicles Enhance Osteogenic Differentiation of Mesenchymal Stem Cells without any Chemical Agents
Source: Research Square preprint supplement (doi:10.21203/rs.3.rs-5741549/v1), 2025-01-02

**Extracellular Vesicles Enhance Osteogenic Differentiation of Mesenchymal Stem Cells Without any Chemical Agents**

Ganga Anand1, Srinivas Gopala2, Madhusoodanan Urulangodi2*, Manoj Komath1*

**Materials and Methods**

**Osteogenic differentiation of rBMSCs**

rBMSCs were seeded in six-well plates at a concentration of 5000 cells/cm² and grown in complete media until reaching 60-70% confluence. The experimental group underwent osteogenic differentiation by DMEM-LG enriched with 10% FBS, 1% antibiotics-antimycotics, 50 μM L-ascorbic acid (Sigma #4403), 100 nM dexamethasone (Sigma #D4902), and 10 mM β-glycerophosphate (Sigma #G9422). The control group continued to be cultured in complete media. Both groups were maintained under standard conditions for periods of 7, 14, 21, and 28 days, with fresh media provided every 2 to 3 days [1].

**Alizarin red S (ARS) staining**: The culture medium was discarded; cells underwent fixation with 4% formaldehyde. To visualize mineral calcium deposits, the cells were exposed to 40 mM ARS (Sigma, US, #A5533) at pH 4.2 for 30 min. An inverted fluorescence and phase contrast microscope (Olympus IX51) was used to capture images. After imaging, 1 ml of 10% acetic acid was applied to extract the calcium deposits for quantitative analysis and measured absorbance at 405 nm, following a previously described method [2].

**Analysis of gene expression related to osteogenesis:** Cells were washed twice in PBS, and total RNA was isolated from cells harvested on days 7, 14, 21, and 28 by using RNAiso plus Reagent (Takara Bio #9109, Japan). qRT-PCR analysis was performed (Biorad CFX96, Real-time system, C1000 Touch, Singapore) using TB Green Premix Ex TaqII (TaKaRa #RR82LR, Japan) or Power up SYBR green kit as specified earlier. Expression of bone-related genes *Osteonectin (ONC), Osteopontin (OPN), RUNX2, Osterix (OSX), Osteocalcin (OCN), Bone morphogenetic proteins (BMP2, BMP4), Alkaline phosphatase (ALP) and Collagen type 1α1 (COL1α1)* (**Table S1**) were analyzed. The data were analyzed using the comparative threshold cycle value (ΔΔCT) method and presented as the relative mRNA expression level.

**Immunofluorescence staining:** Following osteogenic differentiation at various time intervals along with their respective control groups to examine the protein expression of RUNX2 (1:200, rabbit mAb #12556, Cell Signaling Technology) and COL1α1 (1:200, Goat Anti-Mouse IgG, Abcam #ab90395) by immunofluorescence staining carried out as mentioned earlier. Corresponding Alexafluor 488 labeled secondary antibodies: Goat Anti Rabbit IgG H&L (Abcam, Alexa Fluor® 488, # ab150077) and Goat Anti-Mouse IgG H&L (Abcam, Alexa Fluor® 488, #ab150117) was used followed by mounting medium, Anti-fading with DAPI. An inverted fluorescence microscope was employed to observe and capture images of all stained cell samples.

**Supplementary Table S1:** Specific primers for real-time PCR with optimal annealing temperature

| **Gene** | **Primer** | **Product (bp)** | **Annealing temperature (°C)** | **Reference** |
| --- | --- | --- | --- | --- |
| *CD90* | F: 5′-CCTGACCCGAGAGAAGAA-3′  R: 5′-TGAAGTTGGCTAGAGTAAGGA-3′ | 125 | 60 | [3] |
| *CD34* | F: 5′-GTCACACTGCCTACTACTTC-3′  R: 5′-TCCTCGGATTCCTGAACAT-3′ | 210 | - | [4] |
| *CD 73* | F: 5' CTGGTCAACGGTGGGGATGGATTC 3'  R: 5' TCCGTCCTTCAACTGCTGGGTAAA 3' | 136 | 60 | [4] |
| *CD105* | F: 5' CCCCCGTACGTCTCCTGGCTCATC 3'  R: 5' GGGGTGTGTCTGGGAGCTCGAA 3' | 124 | 62 | [3] |
| *OPN* | F: 5′CCGATGAATCTGATGAGTCCTT3′  R: 5′TCCAGCTGACTTGACTCATGG3′ | 283 | 60 | [5] |
| *ONC* | F: 5′GGAAGCTGCAGAAGAGATGG3′  R: 5′TGCACACCTTTTCAAACTCG3′ | 250 | 60 | [6] |
| *RUNX2* | F: 5' GCCGGGAATGATGAGAACTA3'  R: 5'TTGGGGAGGATTTGTGAAGA3' | 155 | 60 | [7] |
| *BMP4* | F: 5'ACTTCGAGGCGACACTTCTG3'  R: 5' GTCCACCTGCTCCCGAAATA3' | 355 | 58 | [8] |
| *β-Actin* | F: 5'CAGGGTGTGATGGTGGGTATGG3'  R: 5‘AGTTGGTGACAATGCCGTGTTC3' | 114 | 60 | [9] |
| *COL1α1* | F:5′TCCTGCCGATGTCGCTATC3′  R: 5′CAAGTTCCGGTGTGACTCGTG3’ | 233 | 58 | [10] |
| *OCN* | F:5′TCCTGCCGATGTCGCTATC3′  R: 5′CAAGTTCCGGTGTGACTCGTG3’ | 697 | 60 | [11] |
| *ALP* | F: 5’ AACCTGACTGACCCTTCCCTCT3’  R:5’TCAATCCTGCCTCCTTCCACTA3’ | 103 | 58 | [10] |
| *BMP2* | F:5’CCATCACGAAGAAGCCATCGAG3’ R:5’CTTCCTGCATTTGTTCCCGAA3’ | 142 | 60 | [12] |
| *OSX* | F:5’GGAGGCACAAAGAAGCCATA3’ R:5’GGGAAAGGGTGGGTAGTCAT3’ | 155 | 60 | [13] |

OPN: Osteopontin, ONC: Osteonectin, RUNX2: Runt-related transcription factor 2, BMP: Bone morphogenetic protein, COL1α1: Collagen type 1α1, OCN: Osteocalcin, ALP: Alkaline phosphatase, OSX: Osterix

**
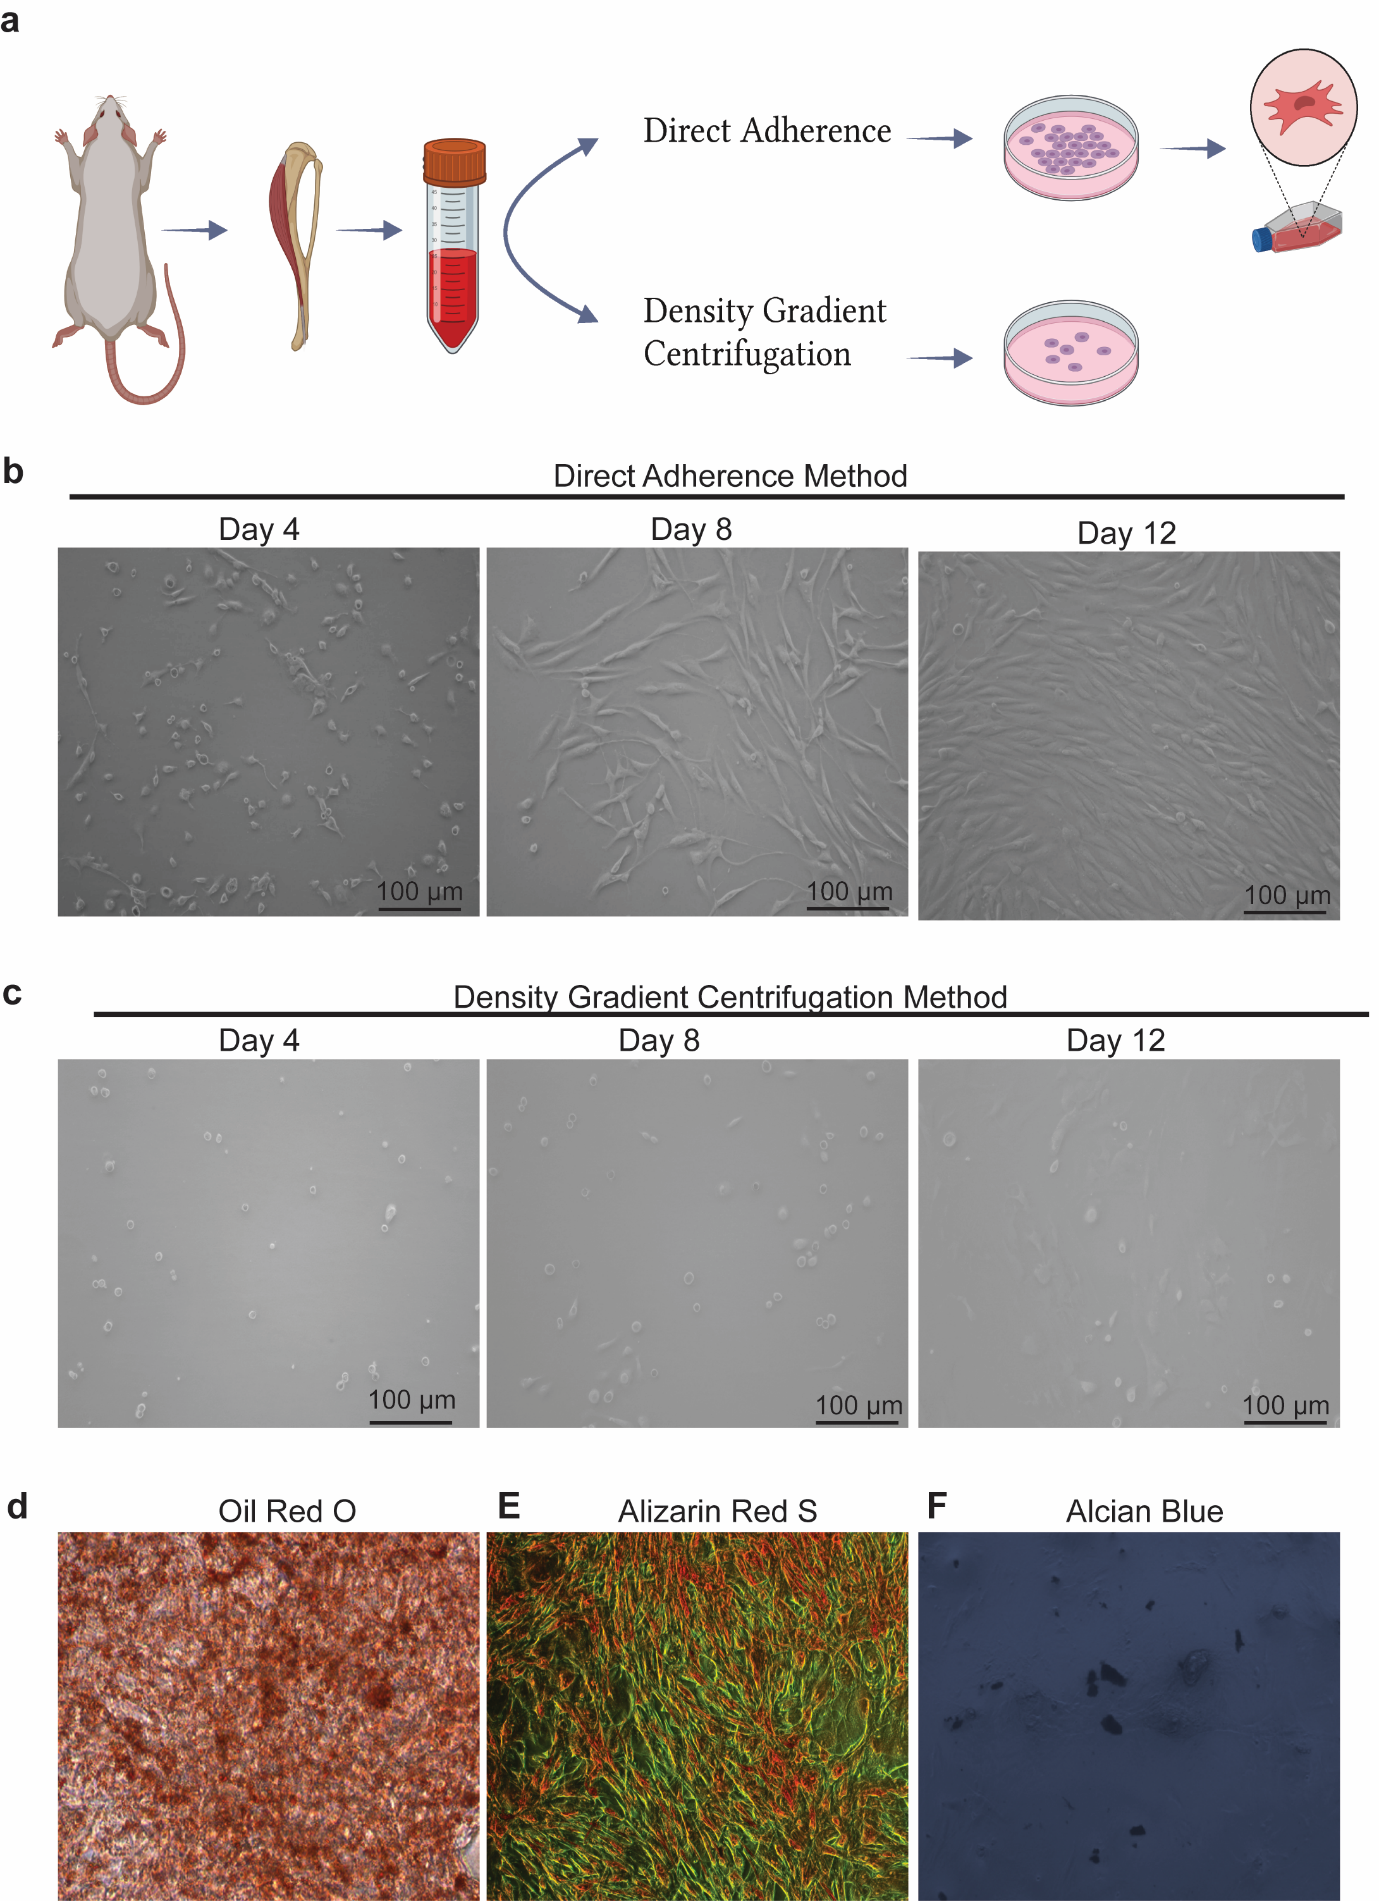
**

**Fig. S1 rBMSC isolation (a)** Schematic diagram of rBMSC isolation from rat. The workflow illustrates isolation of rBMSCs. Representative images of rBMSCs (10x) isolated by **(b)** Direct adherence and **(c)** Density gradient centrifugation for 4, 8, and 12 days. Trilineage differentiation of rBMSC (10x). **(d)** Oil Red O staining of adipogenic MSCs. (**e**) ARS staining in osteogenic rBMSCs, **(f)** Alcian blue staining in chondrogenic MSCs.

**
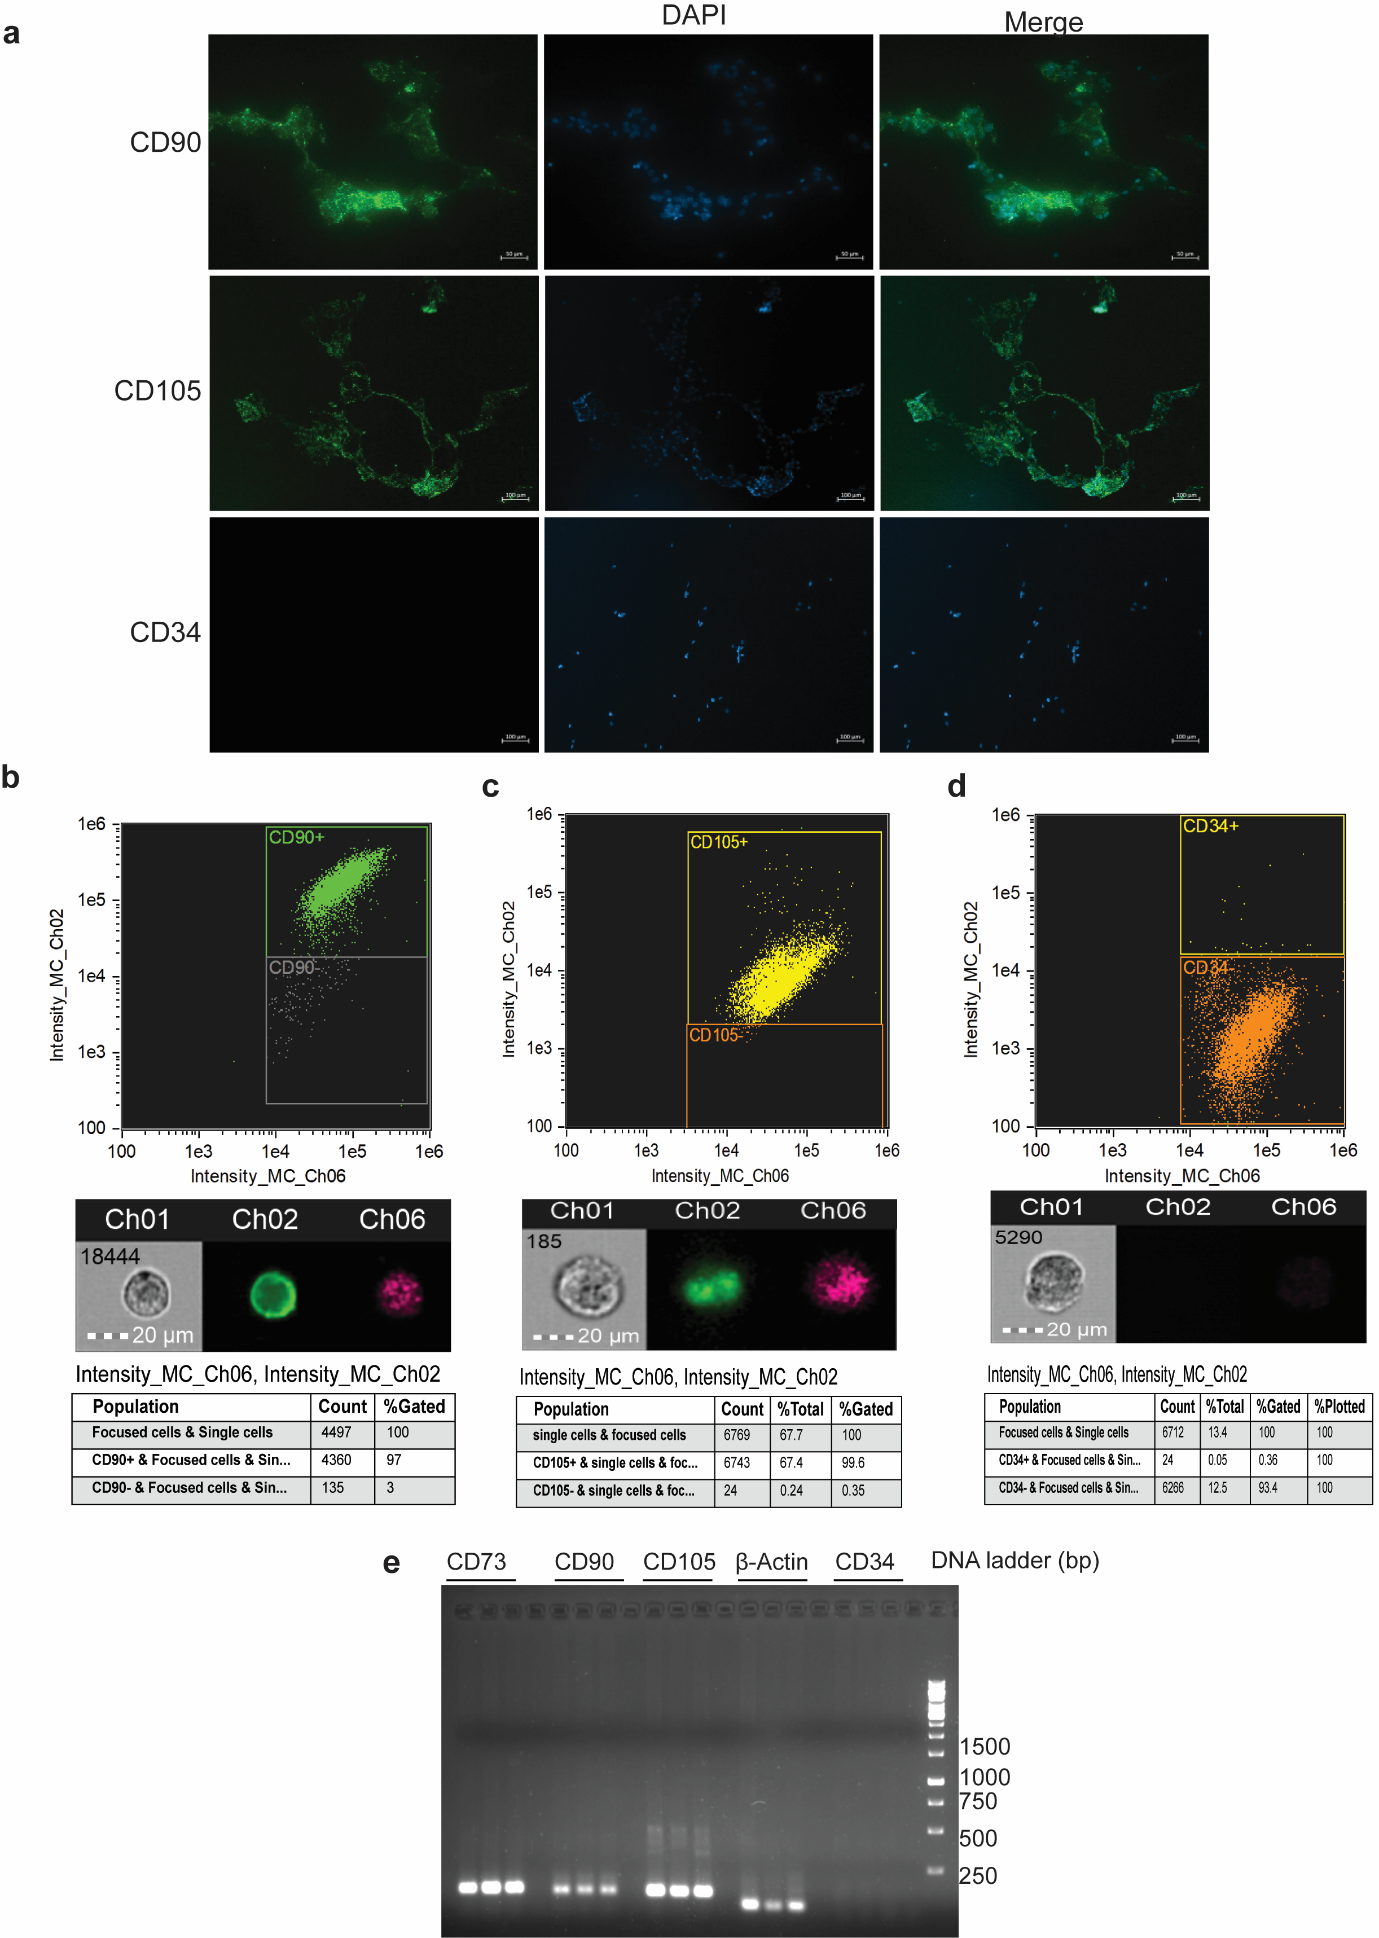
Fig. S2 Characterization of rBMSC** rBMSCs were analyzed using **(a)** immunofluorescence staining for MSC-specific surface markers, showing positive results for CD90 and CD105 and negative for CD34 (scale bar-100 μm). Flow cytometric dot plots displayed specific cell populations: **(b)** CD90, **(c)** CD105, and **(d)** CD34. Agarose gel electrophoresis of rBMSC qRT-PCR products demonstrated **(e)** positive expression of CD73, CD90, and CD105, negative expression of CD34, and utilized β-Actin as a positive control.


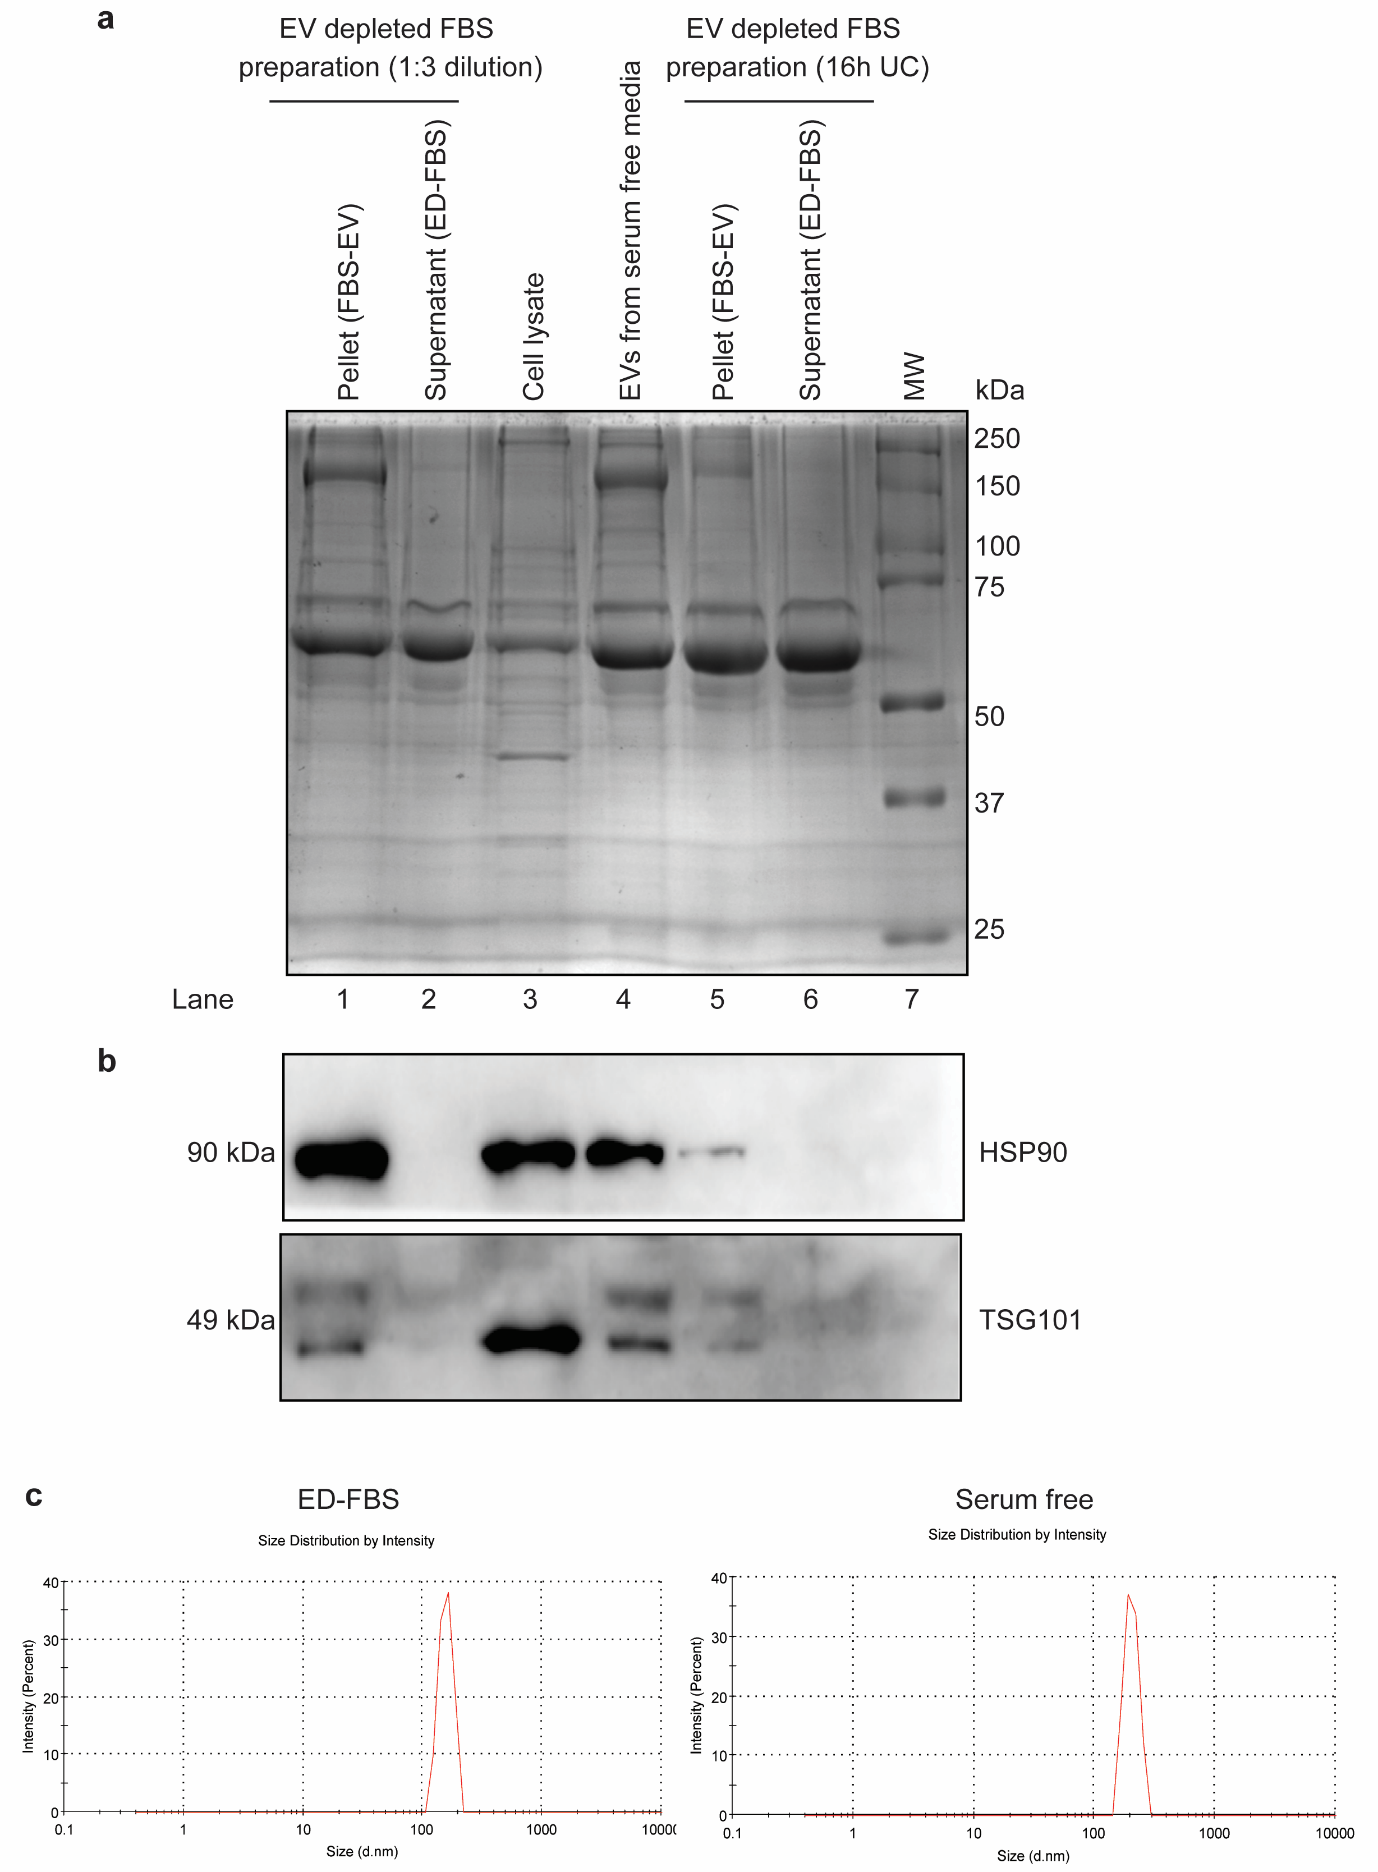


**Fig. S3 Evaluation of EV Depletion from FBS.** **(a)** Coomassie staining results for ED-FBS (supernatant) and FBS-EV (pellet) samples were prepared using two methods: undiluted and diluted with cell culture media at a 1:3 ratio (FBS: culture media). **(b)** Western blot analysis using EV markers HSP90 and TSG101 to validate the EV depletion process. **(c)** DLS analysis of EVs isolated from rBMSC cultures expanded from T25 to T150 flasks, demonstrating the scale-up process (Scale bar: 100 µm).

**
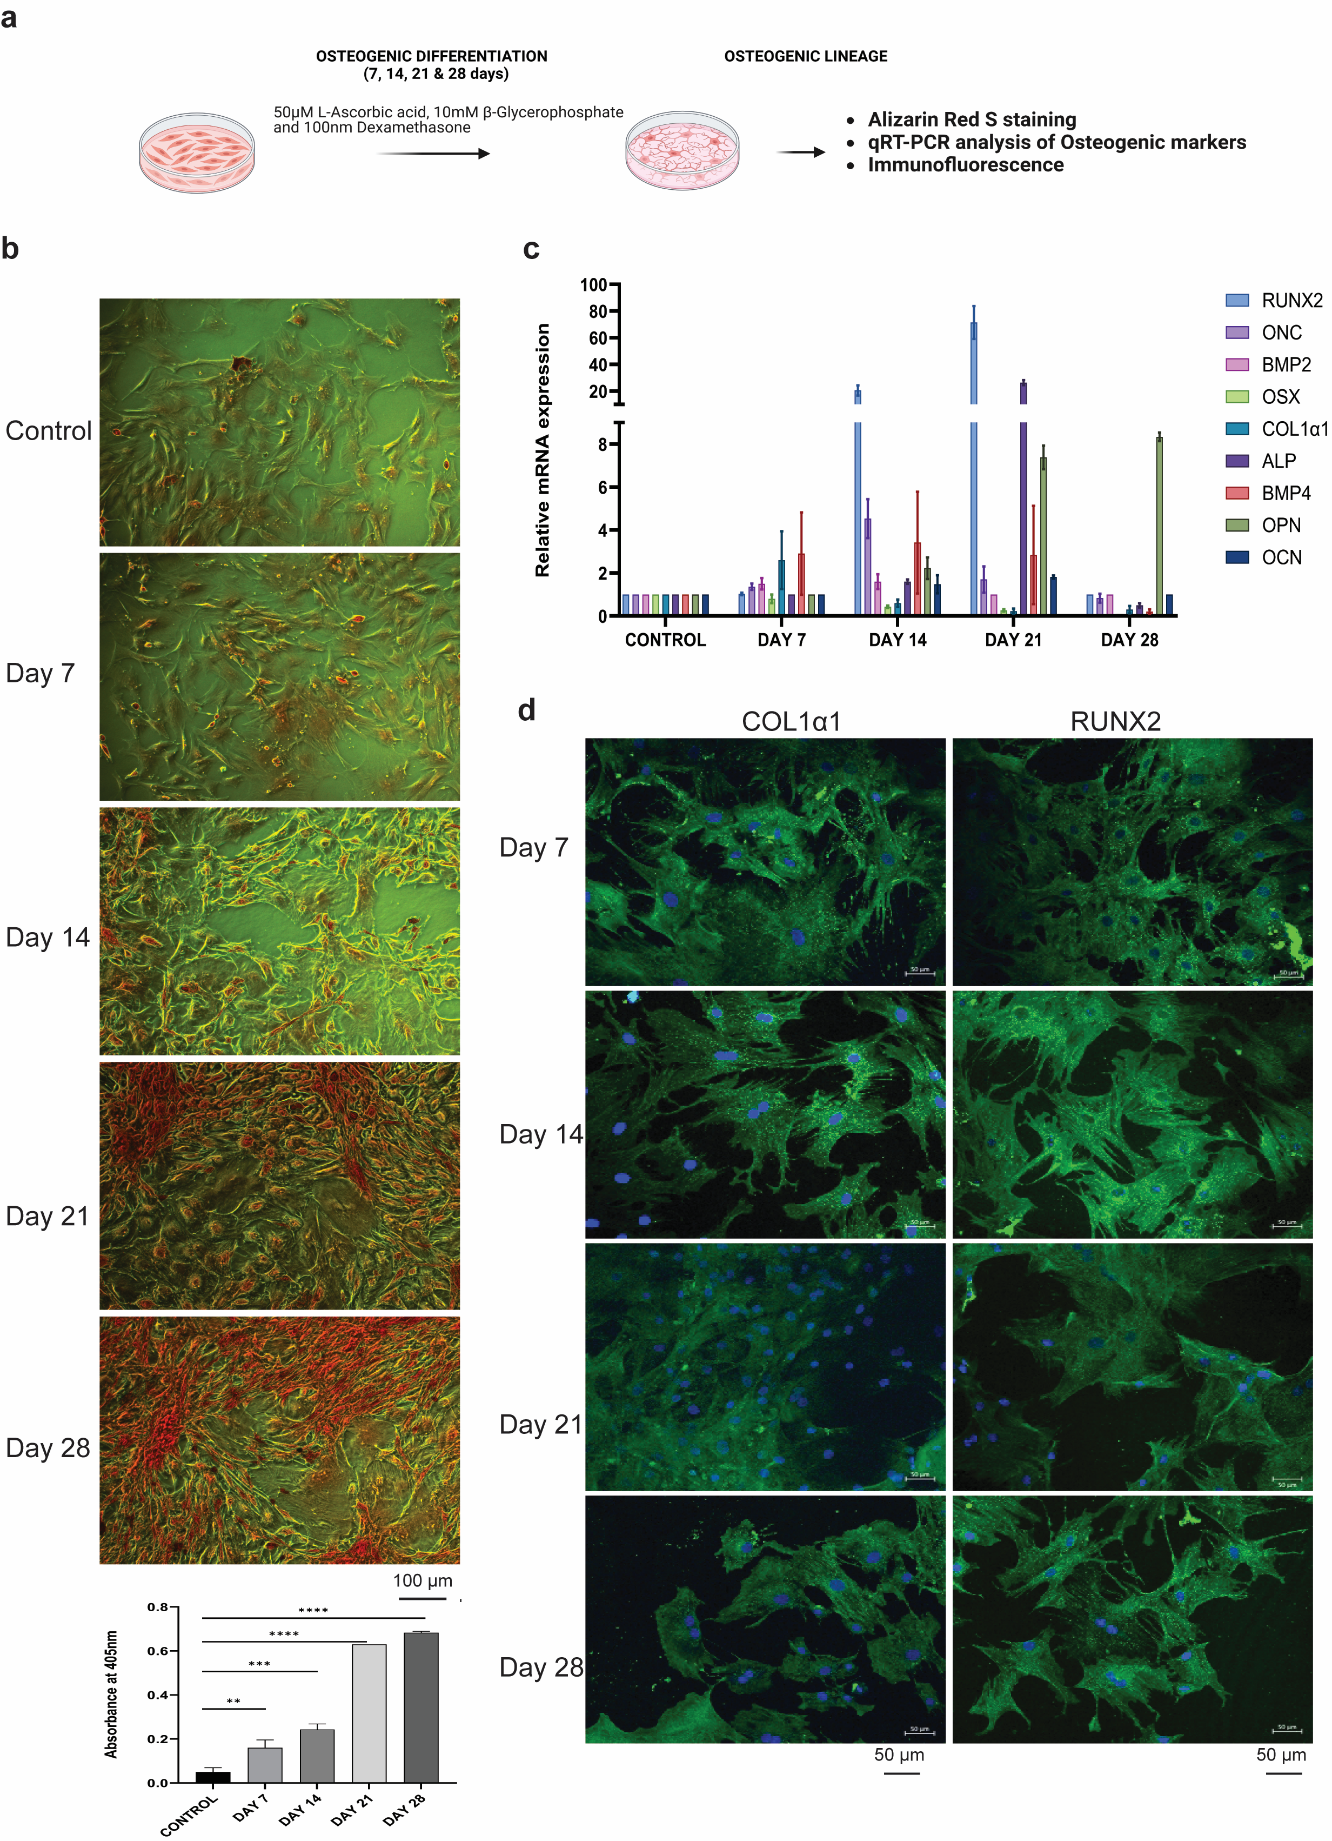
Fig. S4 Osteogenic differentiation of rBMSC. (a)** Schema of the osteogenic differentiation protocol. **(b)** ARS staining at various time intervals. Experiments were performed in triplicate, SD was calculated (**c**) qRT-PCR analysis of osteogenic marker expression during differentiation, and relative mRNA expression was normalized against the housekeeping gene β-Actin. **(d)** Immunofluorescence analysis of specific osteogenic proteins RUNX2 and COL1α1 (Scale bars: 50µm). Statistical significance indicated as **P ≤ 0.01, ***P ≤ 0.001, and ****P ≤ 0.0001

**
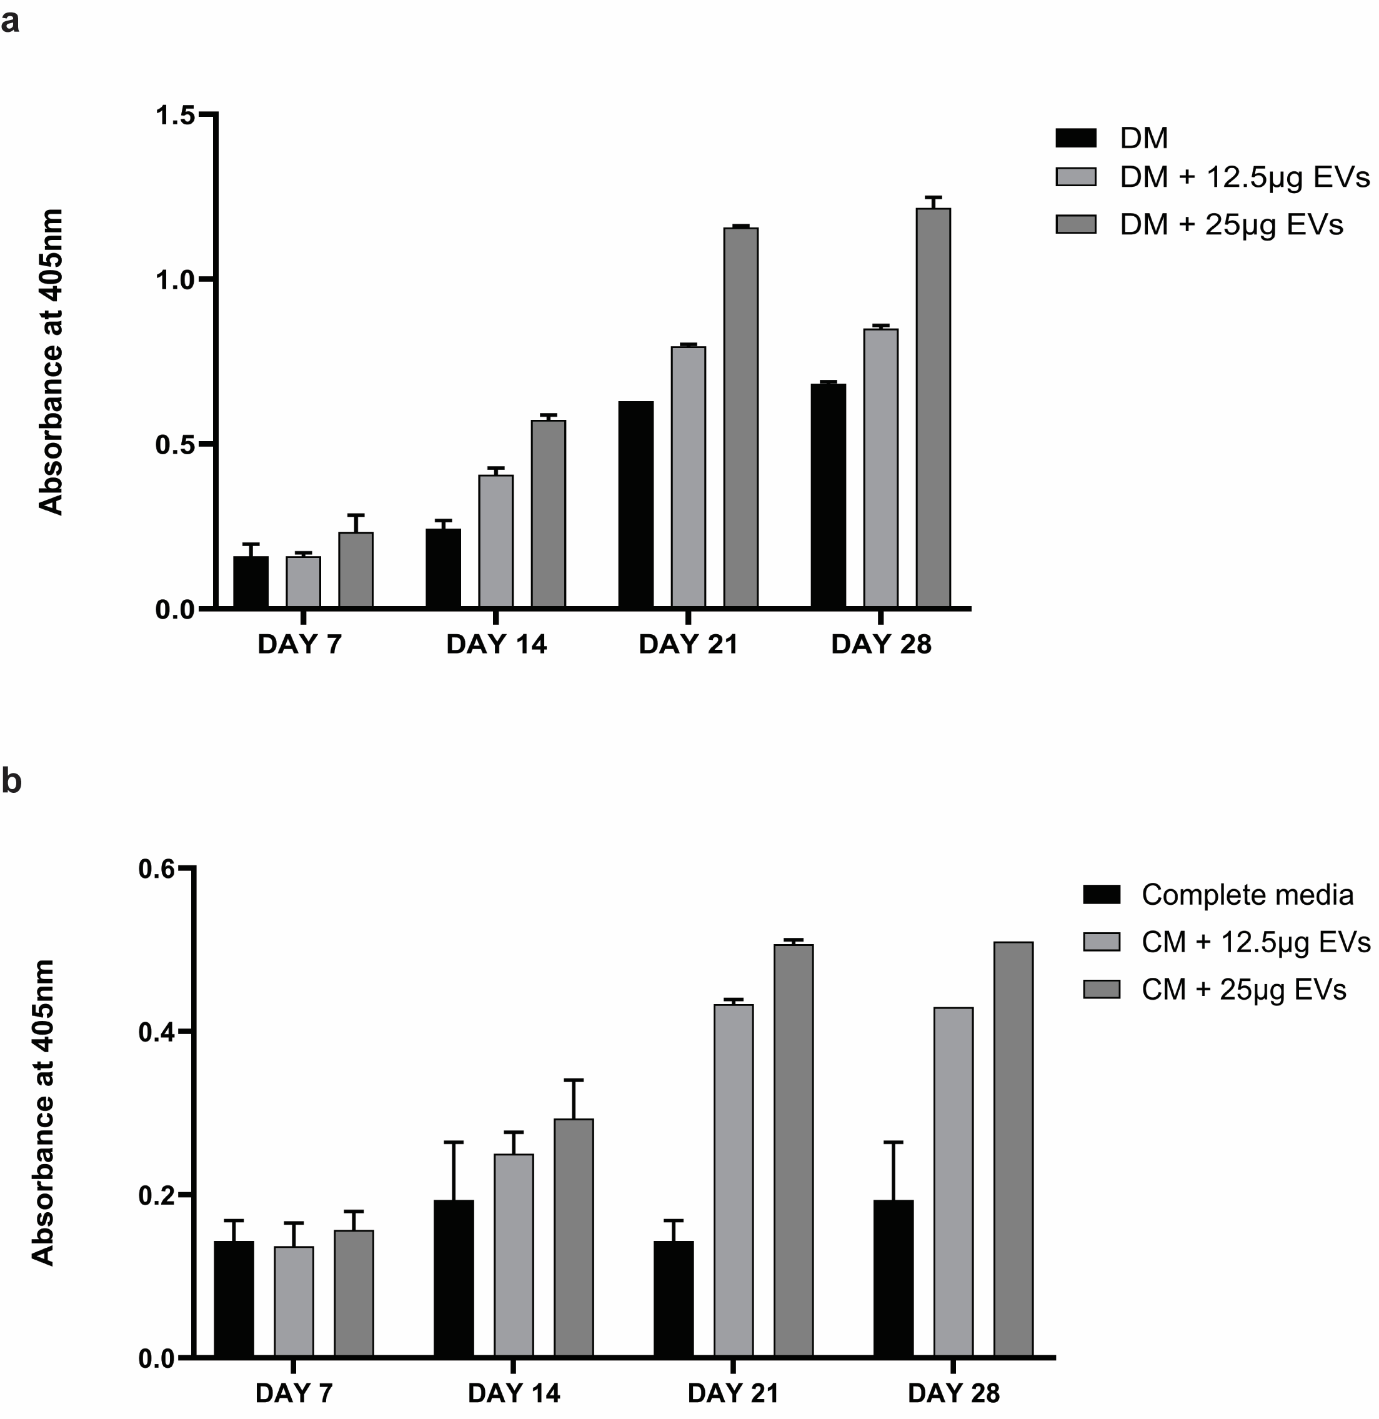
Fig. S5 Evaluation of Osteogenic Differentiation via Calcium Deposition Using ARS Staining.** Image analysis and quantification of the extracted ARS stain indicated a significant increase in mineralization in the EV-treated groups compared to the non-treated group on days 7, 14, 21, and 28 in both **(a)** DM and **(b)** CM groups.

**REFERENCES**

[1] J. Neves Boeloni, N. Melo Ocarino, A. Miranda Goes, and R. Serakides, “Comparative study of osteogenic differentiation potential of mesenchymal stem cells derived from bone marrow and adipose tissue of osteoporotic female rats,” *Connect. Tissue Res.*, vol. 55, no. 2, pp. 103–114, Apr. 2014, doi: 10.3109/03008207.2013.860970.

[2] A. T. Qureshi, C. Chen, F. Shah, C. Thomas-Porch, J. M. Gimble, and D. J. Hayes, “Human Adipose-Derived Stromal/Stem Cell Isolation, Culture, and Osteogenic Differentiation,” in *Methods in Enzymology*, vol. 538, Elsevier, 2014, pp. 67–88. doi: 10.1016/B978-0-12-800280-3.00005-0.

[3] N. Yusop, P. Battersby, A. Alraies, A. J. Sloan, R. Moseley, and R. J. Waddington, “Isolation and Characterisation of Mesenchymal Stem Cells from Rat Bone Marrow and the Endosteal Niche: A Comparative Study,” *Stem Cells Int.*, vol. 2018, pp. 1–14, 2018, doi: 10.1155/2018/6869128.

[4] K. Kumar *et al.*, “Rat bone marrow derived mesenchymal stem cells differentiate to germ cell like cells,” Cell Biology, preprint, Sep. 2018. doi: 10.1101/418962.

[5] L. Medvecky, M. Giretova, R. Stulajterova, L. Luptakova, and T. Sopcak, “Tetracalcium Phosphate/Monetite/Calcium Sulfate Hemihdrate Biocement Powder Mixtures Prepared by the One-Step Synthesis for Preparation of Nanocrystalline Hydroxyapatite Biocement-Properties and In Vitro Evaluation,” *Materials*, vol. 14, no. 9, p. 2137, Apr. 2021, doi: 10.3390/ma14092137.

[6] L. Medvecky, M. Giretova, R. Stulajterova, L. Luptakova, and T. Sopcak, “Tetracalcium Phosphate/Monetite/Calcium Sulfate Hemihdrate Biocement Powder Mixtures Prepared by the One-Step Synthesis for Preparation of Nanocrystalline Hydroxyapatite Biocement-Properties and In Vitro Evaluation,” 2021.

[7] T. Paramasivam, “Culture, Characterization and Differentiation Potential of Rat Bone Marrow derived Mesenchymal Stem Cells,” *J. Stem Cell Res. Ther.*, vol. 1, no. 5, Oct. 2016, doi: 10.15406/jsrt.2016.01.00034.

[8] A. S. Sari, E. Demi̇Rçay, A. Öztürk, A. Terzi̇, and E. Karaöz, “The promising effects of BMP2 transfected mesenchymal stem cells on human osteosarcoma,” *Turk. J. Biol.*, vol. 45, no. 3, pp. 301–313, Jun. 2021, doi: 10.3906/biy-2101-50.

[9] I. Kim, D. Yang, X. Tang, and J. L. Carroll, “Reference gene validation for qPCR in rat carotid body during postnatal development,” *BMC Res. Notes*, vol. 4, no. 1, p. 440, Dec. 2011, doi: 10.1186/1756-0500-4-440.

[10] G. Kaur, Mani. T. Valarmathi, J. D. Potts, E. Jabbari, T. Sabo-Attwood, and Q. Wang, “Regulation of Osteogenic Differentiation of Rat Bone Marrow Stromal Cells on 2D Nanorod Substrates,” *Biomaterials*, vol. 31, no. 7, pp. 1732–1741, Mar. 2010, doi: 10.1016/j.biomaterials.2009.11.041.

[11] M. Yu *et al.*, “Surface hydroxyl groups regulate the osteogenic differentiation of mesenchymal stem cells on titanium and tantalum metals,” *J. Mater. Chem. B*, vol. 5, no. 21, pp. 3955–3963, 2017, doi: 10.1039/C7TB00111H.

[12] E. Fathi and R. Farahzadi, “Enhancement of osteogenic differentiation of rat adipose tissue-derived mesenchymal stem cells by zinc sulphate under electromagnetic field via the PKA, ERK1/2 and Wnt/β-catenin signaling pathways,” *PLOS ONE*, vol. 12, no. 3, p. e0173877, Mar. 2017, doi: 10.1371/journal.pone.0173877.

[13] J. Lu *et al.*, “iRoot BP Plus promotes osteo/odontogenic differentiation of bone marrow mesenchymal stem cells via MAPK pathways and autophagy,” *Stem Cell Res. Ther.*, vol. 10, no. 1, p. 222, Dec. 2019, doi: 10.1186/s13287-019-1345-3.

**Raw data**


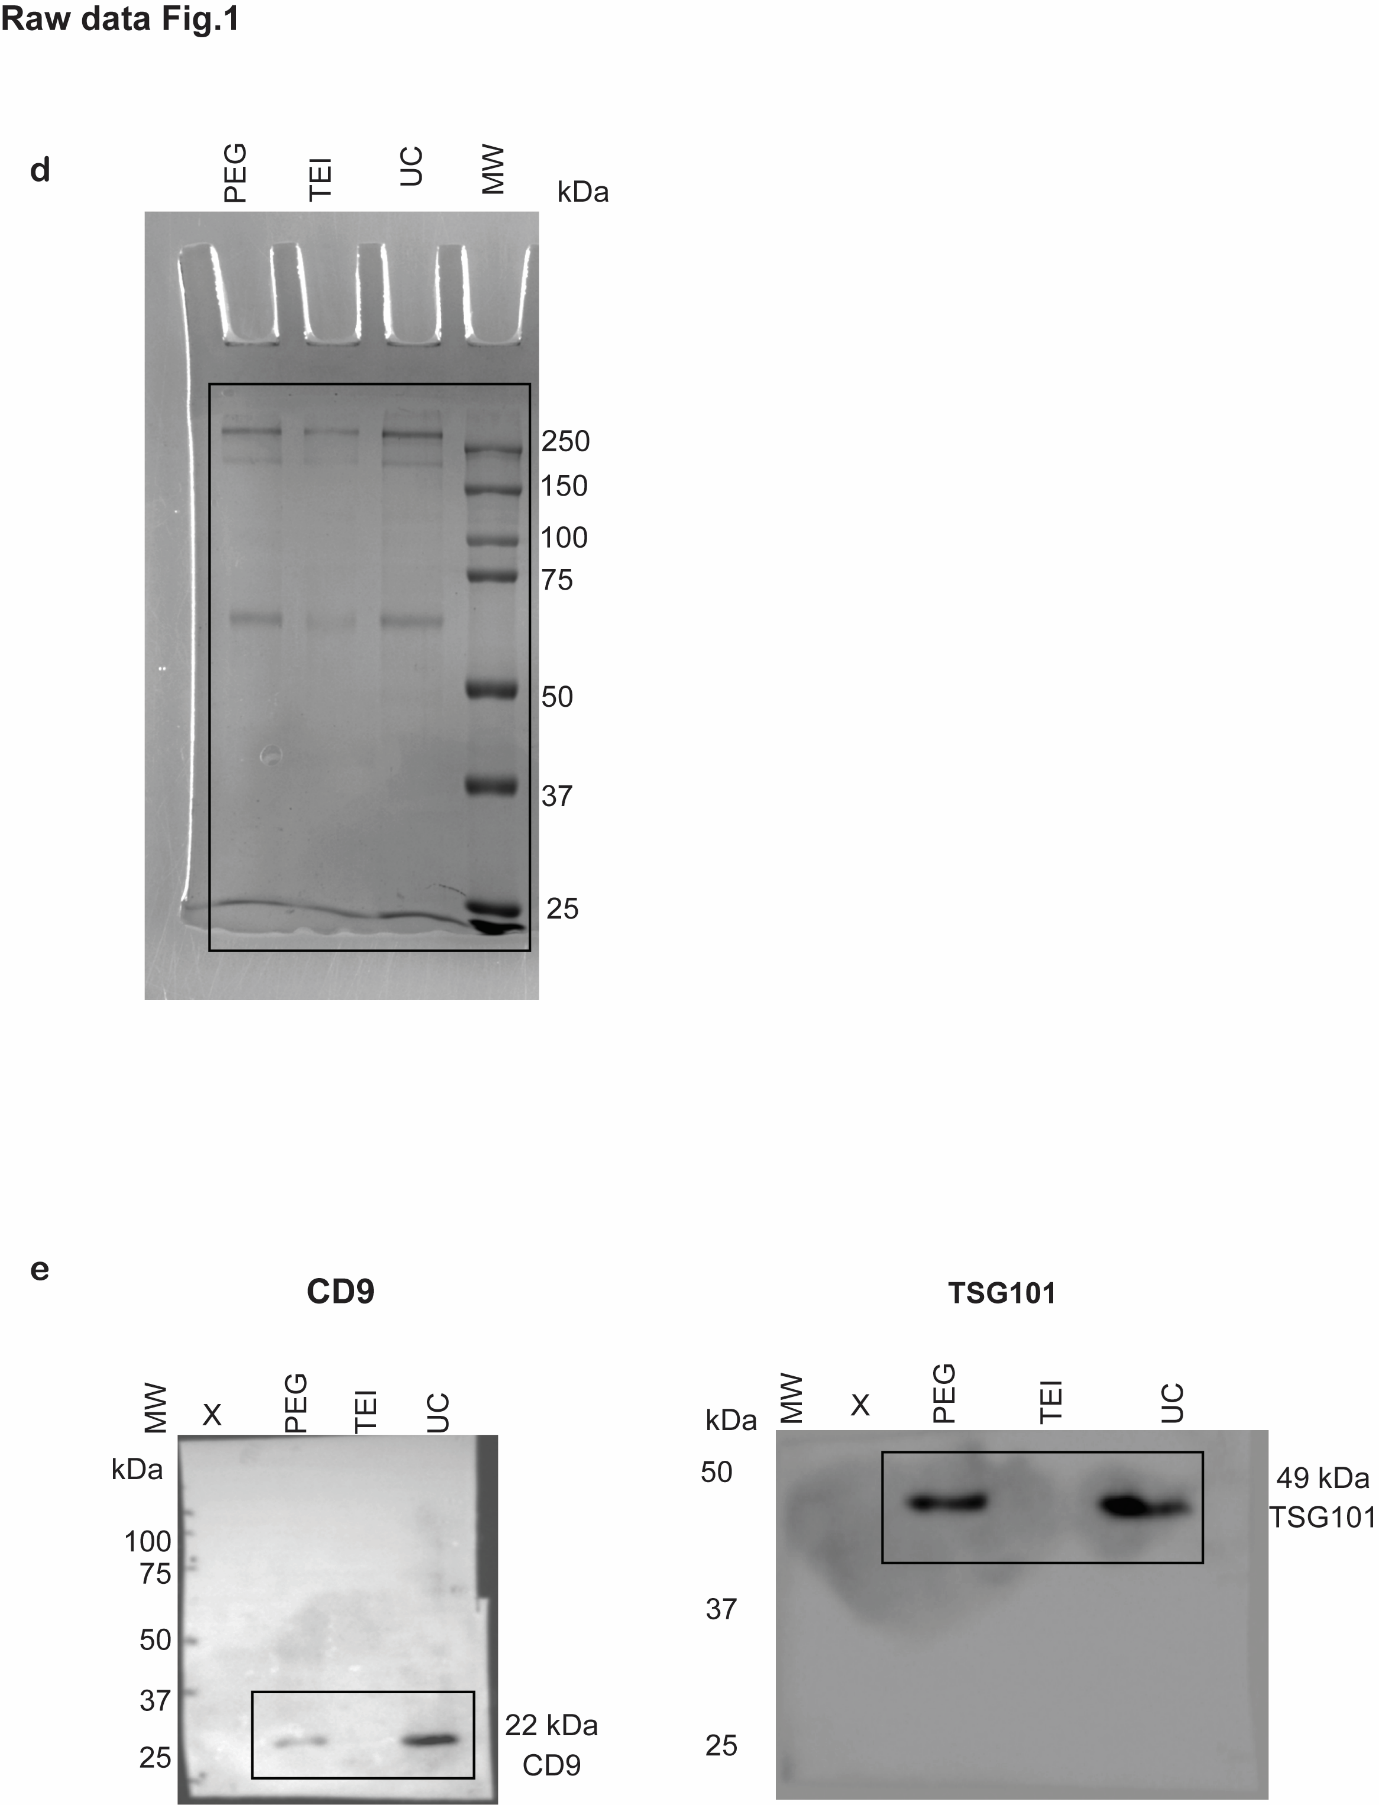


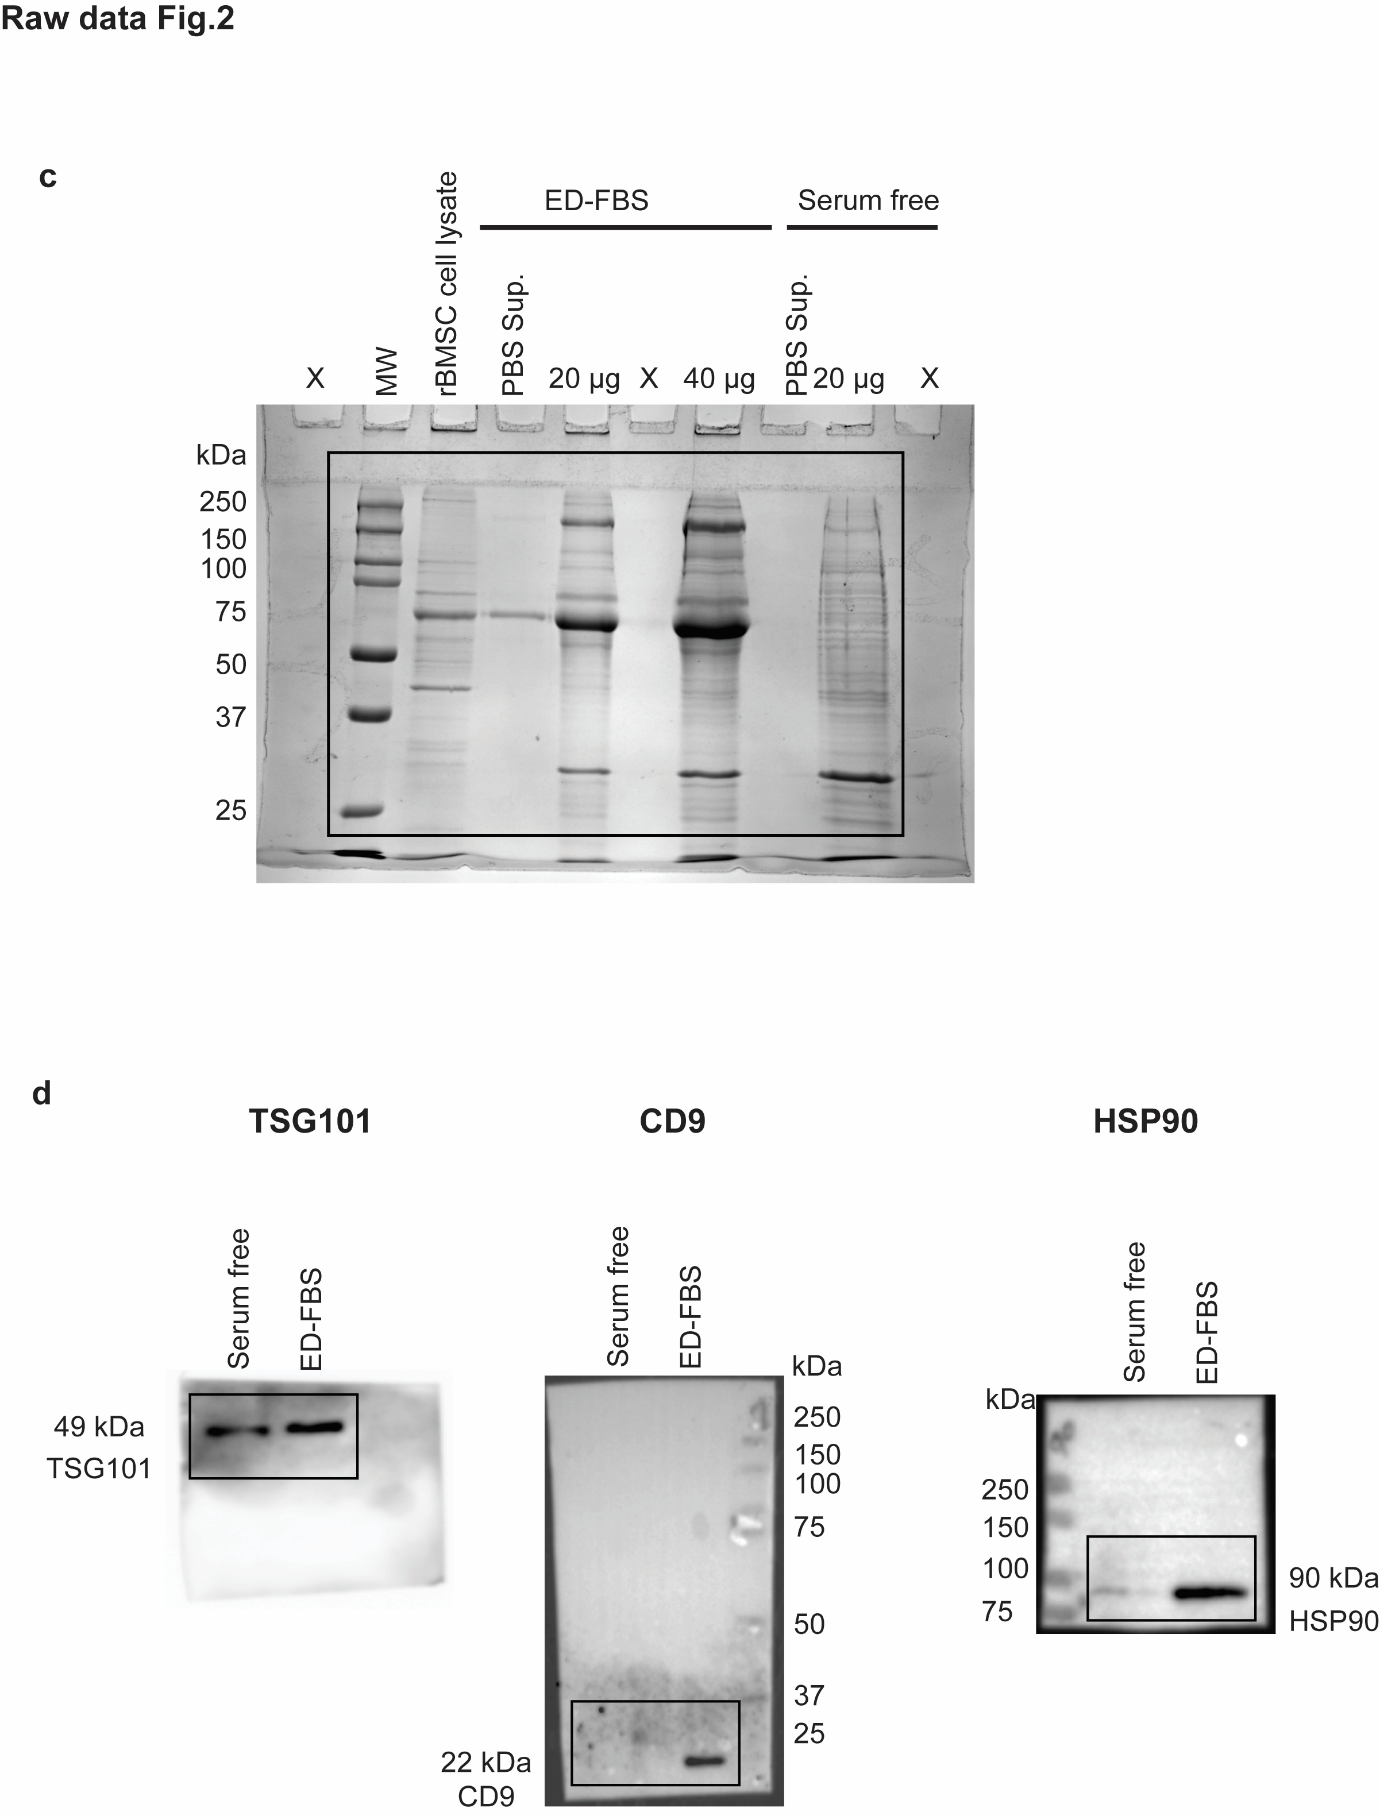


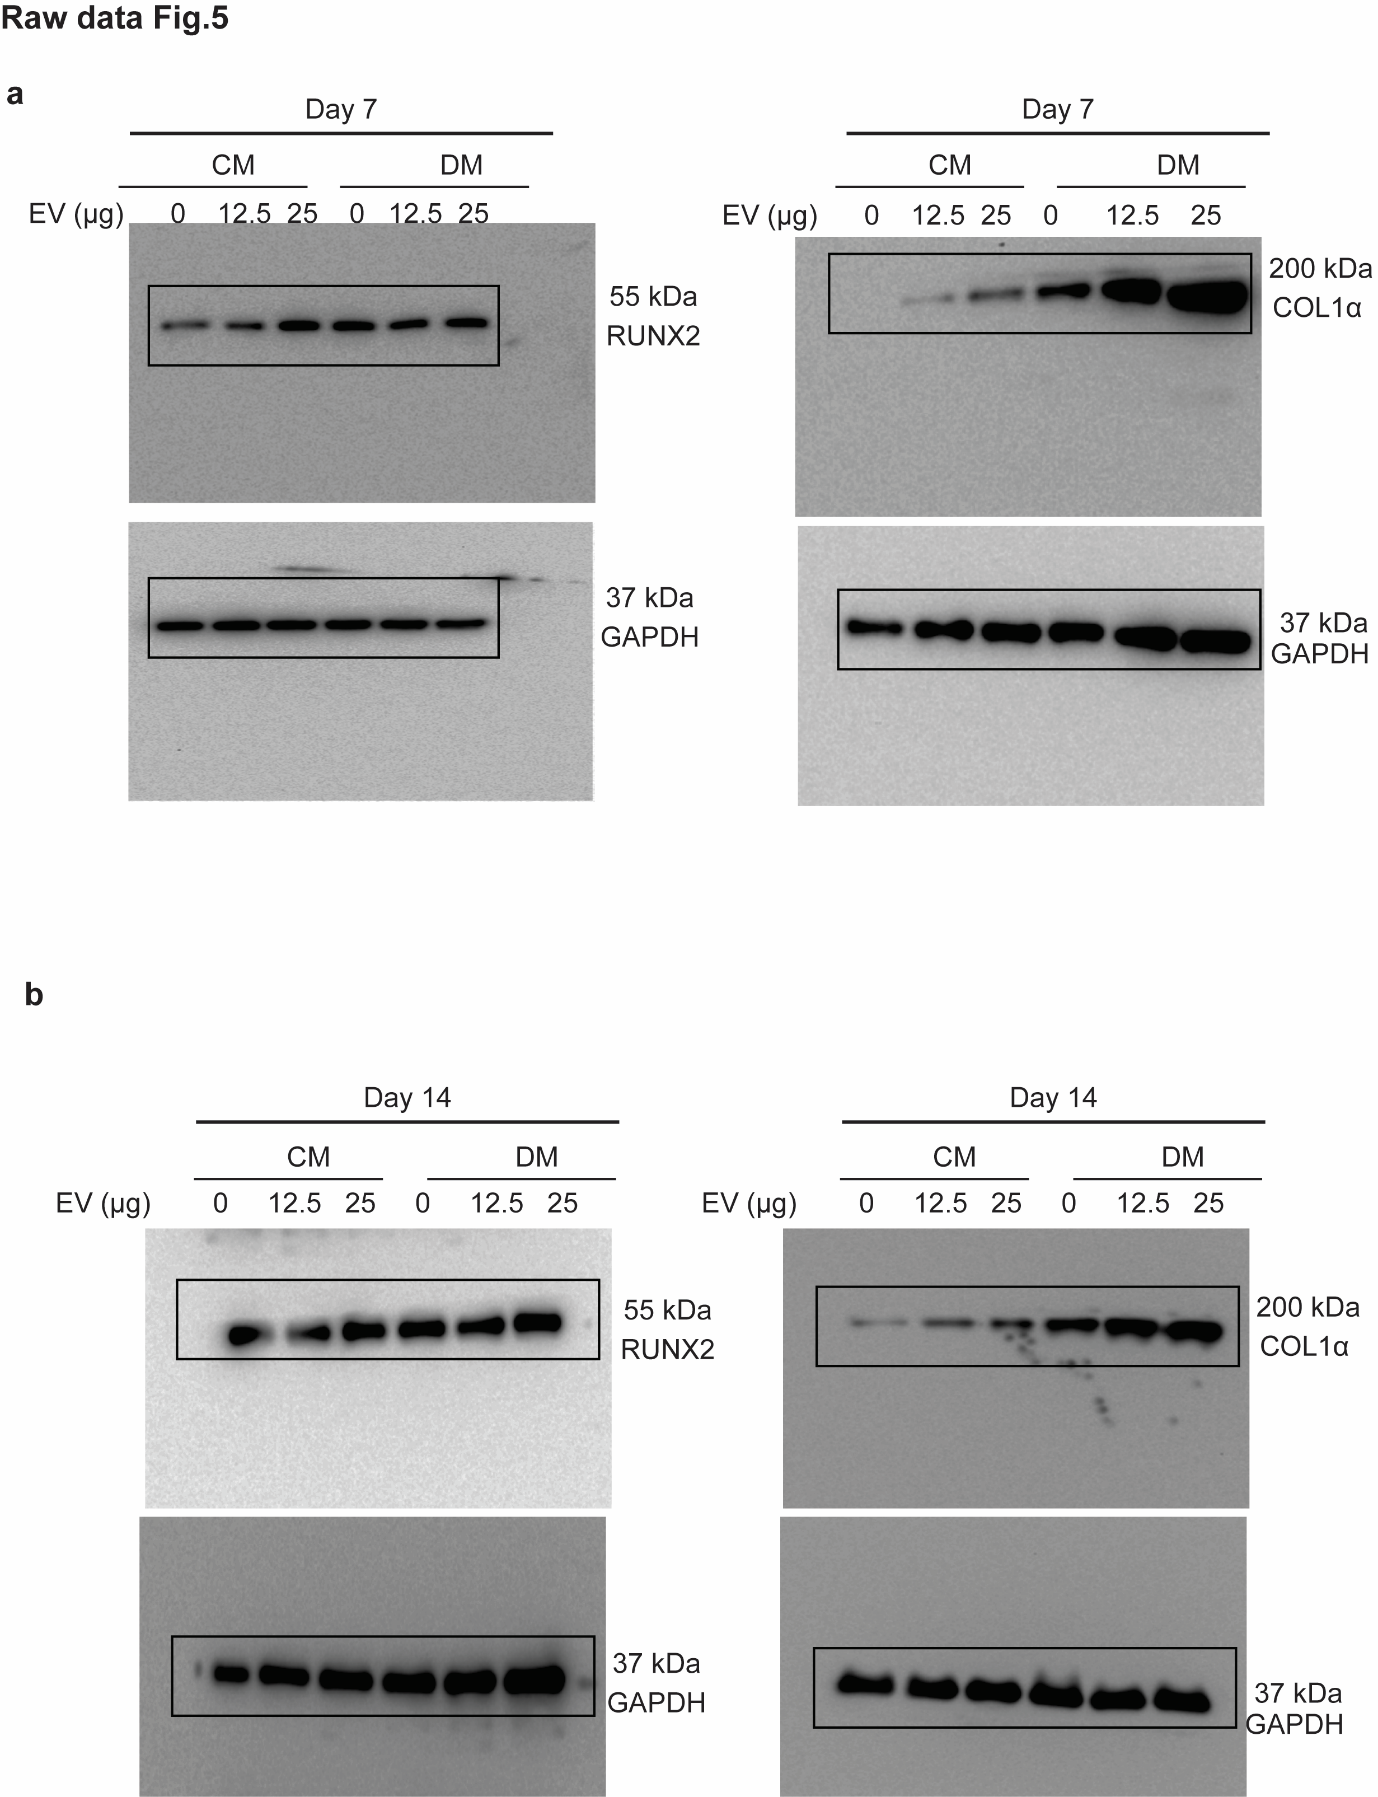


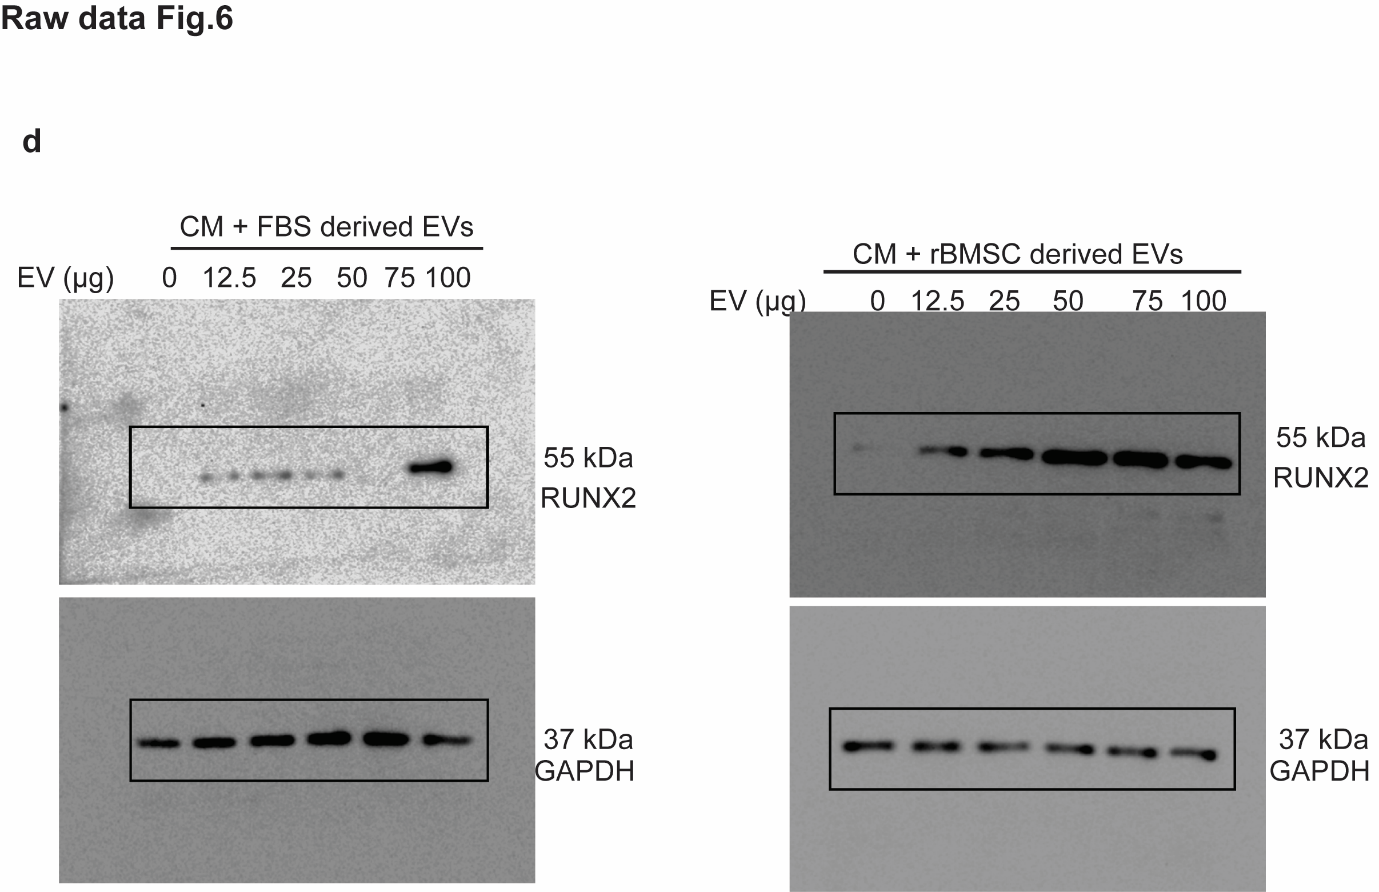


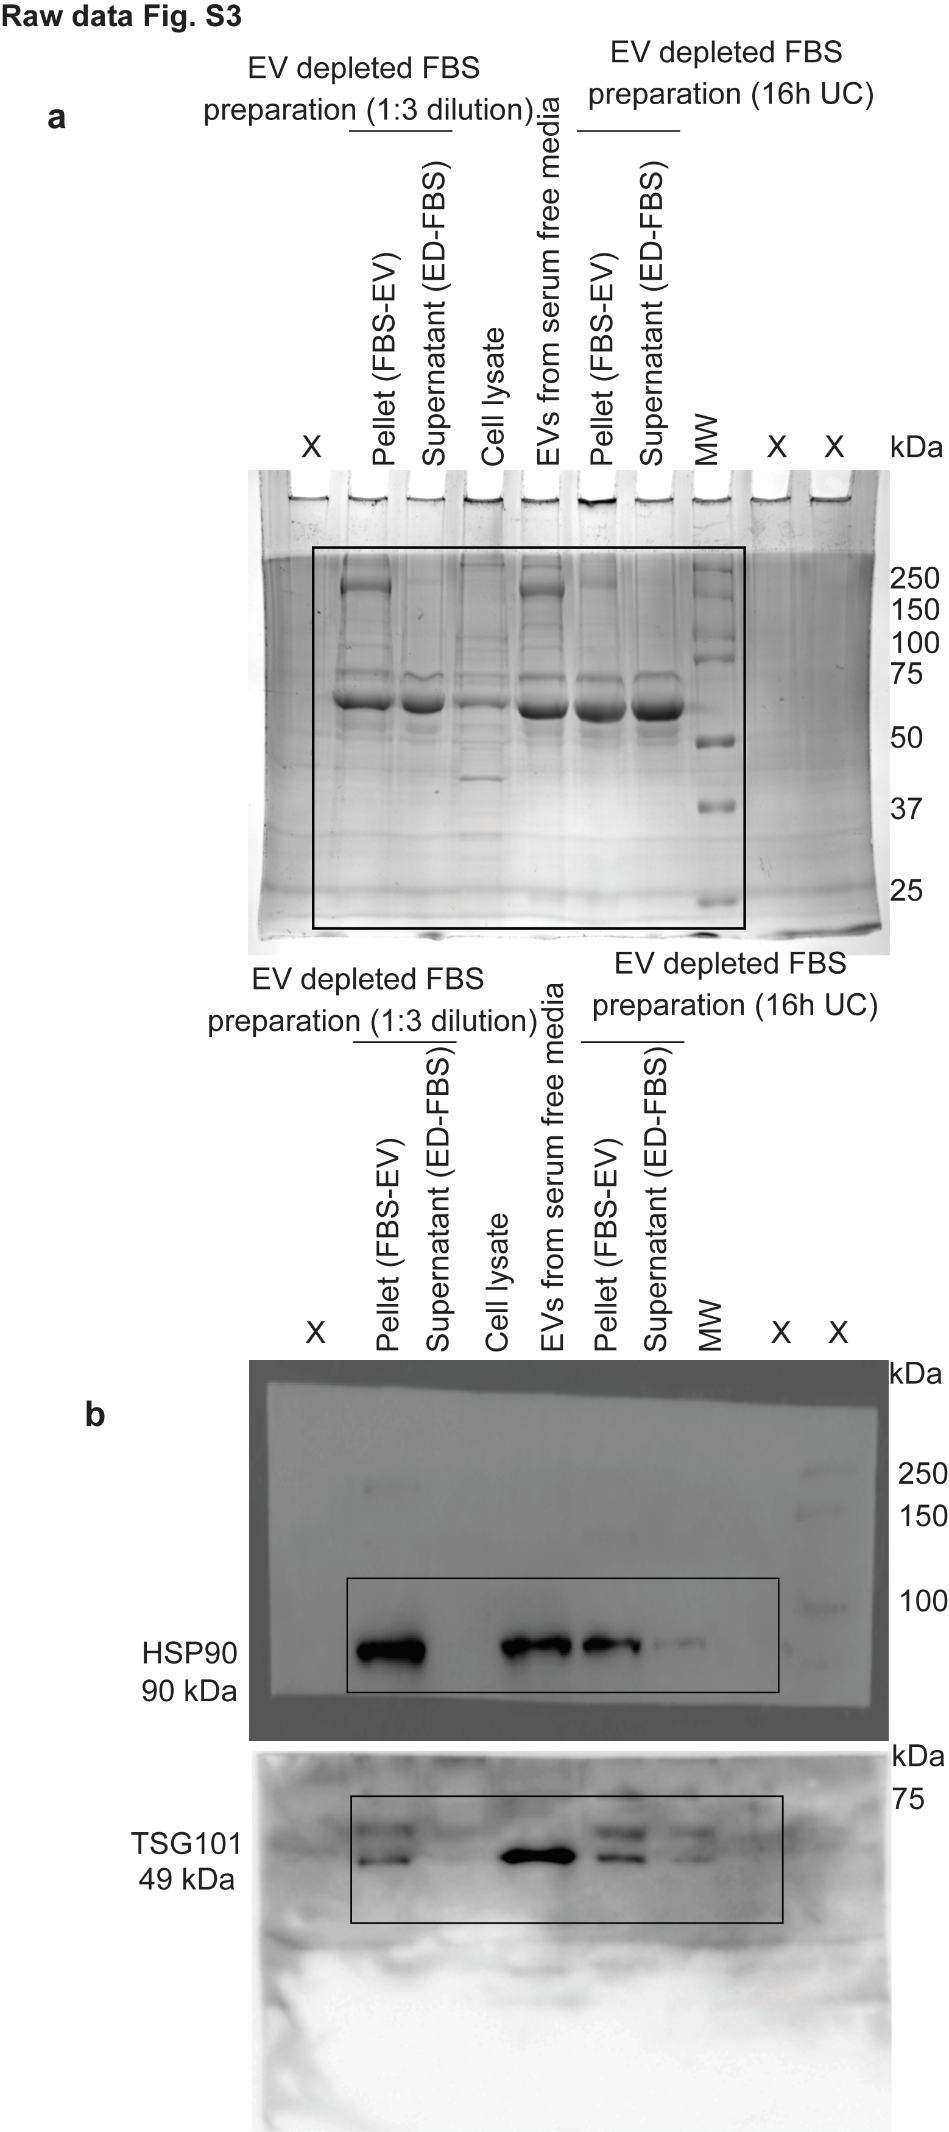

Supplement: Supplementary file 1 [file b81b329a0fd6944b249ecd16.docx]
